# Supplementary material
Source: publisher site journal article supplement (https://www.dovepress.com/article/581816)
Supplement: Supplementary file 1 [file 581816_Supplementary%20Table.docx]

**Table S1** Convenience and accuracy in emergency medical triage protocol and criteria-based dispatch code manual application

| **Evaluation items** | **Opinion levels** | | | | | | | | | | **Mean** | **Median** | **Interpretation** |
| --- | --- | --- | --- | --- | --- | --- | --- | --- | --- | --- | --- | --- | --- |
| **Lowest (1)** | | **Low (2)** | | **Moderate (3)** | | **High (4)** | | **Highest (5)** | |
| **n** | **(%)** | **n** | **(%)** | **n** | **(%)** | **n** | **(%)** | **n** | **(%)** |
| **1 Structure** |  |  |  |  |  |  |  |  |  |  |  |  |  |
| 1. Call handling procedure, emergency operation dispatch, and emergency patient assistance coordination | | | | | |  |  |  |  |  |  |  |  |
| 1.1 Where is the patient? | 0 | (0.0) | 0 | (0.0) | 1 | (2.5) | 1 | (2.5) | 38 | (95.0) | 4.92 | 0.35 | Highest |
| 1.2 Which number do you call from? | 2 | (5.0) | 2 | (5.0) | 4 | (10.0) | 4 | (10.0) | 28 | (70.0) | 4.35 | 1.17 | Highest |
| 1.3. What happened? |  |  |  |  |  |  |  |  |  |  |  |  |  |
| 1.3.1 In case the informer clearly knows the incident |  |  |  |  |  |  |  |  |  |  |  |  |  |
| 1.3.1.1 Breathlessness and unconsciousness 9-Red-1 | 1 | (2.5) | 0 | (.0) | 1 | (2.5) | 9 | (22.5) | 29 | (72.5) | 4.63 | 0.77 | Highest |
| 1.3.1.2 Hanging, strangulation (no assailant), breathing difficulty 9-Red-3,4,5 | 2 | (5.0) | 2 | (5.0) | 5 | (12.5) | 13 | (32.5) | 18 | (45.0) | 4.08 | 1.12 | High |
| 1.3.1.3 (Choking) cough/breathe? (“You check, then tell me what you find.”) breathlessness, silent cough “Do not hit her/his back.”11-Red-1 | 3 | (7.5) | 1 | (2.5) | 7 | (17.5) | 10 | (25.0) | 19 | (47.5) | 4.02 | 1.21 | High |
| 1.3.2 In case the informer has not clearly known the incident yet |  |  |  |  |  |  |  |  |  |  |  |  |  |
| 1.3.2.1 Are you with the patient now? | 0 | (0.0) | 0 | (0.0) | 2 | (5.0) | 9 | (22.5) | 29 | (72.5) | 4.68 | 0.57 | Highest |
| 1.3.2.2 How many injured/patients are there? | 0 | (0.0) | 1 | (2.5) | 4 | (10.0) | 9 | (22.5) | 26 | (65.0) | 4.50 | 0.78 | Highest |
| 1.4 How old is the patient (if unsure, estimate the age)? | 0 | (0.0) | 0 | (0.0) | 2 | (5.0) | 9 | (22.5) | 29 | (72.5) | 4.68 | 0.57 | Highest |
| 1.5 Is the patient conscious (conscious/unconscious / unknown)? | 0 | (0.0) | 0 | (0.0) | 1 | (2.5) | 5 | (12.5) | 34 | (85.0) | 4.83 | 0.45 | Highest |
| 1.6 Does the patient breathe normally (breathe normally/do not breathe/breathe abnormally/do not know breathing situation)? | 0 | (0.0) | 1 | (2.5) | 1 | (2.5) | 5 | (12.5) | 33 | (82.5) | 4.75 | 0.63 | Highest |
| Overall call handling procedure, emergency operation dispatch, and emergency patient assistance coordination | | | | | | |  |  |  |  | 4.54 | 0.48 | Highest |
| **2. Pre-arrival instructions** |  |  |  |  |  |  |  |  |  |  |  |  |  |
| 2.1 In case ordering red level “I am sending an ambulance to help you now, please stay on the phone all the time”. | 0 | (0.0) | 2 | (5.0) | 3 | (7.5) | 9 | (22.5) | 26 | (65.0) | 4.47 | 0.85 | Highest |
| 2.2 In case of hanging and still alive “Cut the rope and bring the patient down immediately” “Loosen the loop around the neck and inform whether he/she still breathes”. | 0 | (0.0) | 0 | (0.0) | 5 | (12.5) | 6 | (15.0) | 29 | (72.5) | 4.60 | 0.71 | Highest |
| 2.3 In case of drowning and still in water, do not enter water unless able to do so safely. | 1 | (2.5) | 0 | (0.0) | 5 | (12.5) | 10 | (25.0) | 24 | (60.0) | 4.40 | 0.90 | Highest |
| 2.4 In case of burn “Tell the patient to stop running, lie on the ground, put the hands over the patient’s face, then roll on the ground. If there is water, pour the water immediately until the fire is gone. If there is no water, cover the body with a blanket, mat, or huge jacket to extinguish the fire. | 0 | (0.0) | 0 | (0.0) | 4 | (10.0) | 9 | (22.5) | 27 | (67.5) | 4.58 | 0.68 | Highest |
| 2.5 In case the caller is also in a dangerous incident “If you are in danger, leave immediately and call the center from a safe place. | 0 | (0.0) | 1 | (2.5) | 2 | (5.0) | 7 | (17.5) | 30 | (75.0) | 4.65 | 0.70 | Highest |
| 2.6 If unconsciousness or breathlessness/agonal respiration, perform initial treatment with ABC (airway-breathing-circulation). | 5 | (12.5) | 4 | (10.0) | 2 | (5.0) | 9 | (22.5) | 20 | (50.0) | 3.87 | 1.45 | High |
| 2.7 If cardiac arrest is suspected, perform chest compression. | 1 | (2.5) | 0 | (0.0) | 0 | (0.0) | 7 | (17.5) | 32 | (80.0) | 4.73 | 0.72 | Highest |
| Overall pre-arrival instructions |  |  |  |  |  |  |  |  |  |  | 4.47 | 0.51 | Highest |
| **3. Emergency medical conditions** |  |  |  |  |  |  |  |  |  |  |  |  |  |
| 3.1 Abdominal pain triage code 1 | 2 | (5.0) | 2 | (5.0) | 4 | (10.0) | 13 | (32.5) | 19 | (47.5) | 4.13 | 1.11 | High |
| 3.2 Allergic reaction or poisoning from insect or animal bite triage code 2 | 3 | (7.5) | 2 | (5.0) | 5 | (12.5) | 8 | (20.0) | 22 | (55.0) | 4.10 | 1.26 | High |
| 3.3 Animal bite triage code 3 | 3 | (7.5) | 3 | (7.5) | 6 | (15.0) | 10 | (25.0) | 18 | (45.0) | 3.93 | 1.27 | High |
| 3.4 Back pain (not caused by accident or caused by accident over 6 hours) triage code 4 | 3 | (7.5) | 4 | (10.0) | 8 | (20.0) | 11 | (27.5) | 14 | (35.0) | 3.72 | 1.26 | High |
| 3.5 Bleeding (non trauma) triage code 5 | 2 | (5.0) | 2 | (5.0) | 8 | (20.0) | 14 | (35.0) | 14 | (35.0) | 3.90 | 1.11 | High |
| 3.6 Breathing difficulty triage code 6 | 2 | (5.0) | 4 | (10.0) | 5 | (12.5) | 13 | (32.5) | 16 | (40.0) | 3.93 | 1.19 | High |
| 3.7 Cardiac arrest/death triage code 7 | 3 | (7.5) | 3 | (7.5) | 6 | (15.0) | 8 | (20.0) | 20 | (50.0) | 3.98 | 1.29 | High |
| 3.8 Chest pain/chest tightness (not caused by accident) triage code 8 | 2 | (5.0) | 4 | (10.0) | 6 | (15.0) | 13 | (32.5) | 15 | (37.5) | 3.87 | 1.18 | High |
| 3.9 Choking triage code 9 | 2 | (5.0) | 3 | (7.5) | 6 | (15.0) | 12 | (30.0) | 17 | (42.5) | 3.98 | 1.17 | High |
| 3.10 Diabetes triage code 10 | 2 | (5.0) | 3 | (7.5) | 6 | (15.0) | 10 | (25.0) | 19 | (47.5) | 4.03 | 1.19 | High |
| 3.11 Chemical hazard code 11 | 2 | (5.0) | 3 | (7.5) | 5 | (12.5) | 11 | (27.5) | 19 | (47.5) | 4.05 | 1.18 | High |
| 3.12 Ophthalmic problem triage code 12 | 2 | (5.0) | 3 | (7.5) | 9 | (22.5) | 10 | (25.0) | 16 | (40.0) | 3.88 | 1.18 | High |
| 3.13 Ophthalmic problem triage code 13 | 5 | (12.5) | 3 | (7.5) | 10 | (25.0) | 6 | (15.0) | 16 | (40.0) | 3.62 | 1.41 | High |
| 3.14 Fever problem triage code 14 | 2 | (5.0) | 2 | (5.0) | 7 | (17.5) | 12 | (30.0) | 17 | (42.5) | 4.00 | 1.13 | High |
| 3.15 Headache problem triage code 15 | 2 | (5.0) | 2 | (5.0) | 8 | (20.0) | 12 | (30.0) | 16 | (40.0) | 3.95 | 1.13 | High |
| 3.16 Psychiatric condition/behavior change/suicide triage code 16 | 2 | (5.0) | 3 | (7.5) | 7 | (17.5) | 10 | (25.0) | 18 | (45.0) | 3.98 | 1.19 | High |
| 3.17 Drug overdose/poisoning triage code 17 | 2 | (5.0) | 1 | (2.5) | 8 | (20.0) | 11 | (27.5) | 18 | (45.0) | 4.05 | 1.11 | High |
| 3.18 Pregnancy/delivery triage code 18 | 2 | (5.0) | 1 | (2.5) | 8 | (20.0) | 10 | (25.0) | 19 | (47.5) | 4.08 | 1.12 | High |
| 3.19 Seizure triage code 19 | 2 | (5.0) | 3 | (7.5) | 5 | (12.5) | 14 | (35.0) | 16 | (40.0) | 3.98 | 1.14 | High |
| 3.20 Sick/fatigue (nonspecific/idiopathic) triage code 20 | 2 | (5.0) | 2 | (5.0) | 8 | (20.0) | 10 | (25.0) | 18 | (45.0) | 4.00 | 1.16 | High |
| 3.21 Weakness/difficulty speaking/facial droop (ischemic/hemorrhagic stroke) triage code 21 | 2 | (5.0) | 1 | (2.5) | 6 | (15.0) | 13 | (32.5) | 18 | (45.0) | 4.10 | 1.08 | High |
| 3.22 Unconsciousness/nonresponsiveness/ transient unconsciousness triage code 22 | 2 | (5.0) | 2 | (5.0) | 7 | (17.5) | 13 | (32.5) | 16 | (40.0) | 3.98 | 1.12 | High |
| Overall emergency medical conditions |  |  |  |  |  |  |  |  |  |  | 3.96 | 1.05 | High |
| **4. Injuries** |  |  |  |  |  |  |  |  |  |  |  |  |  |
| 4.1 Assault/ sexual assault triage code 23 | 2 | (5.0) | 1 | (2.5) | 9 | (22.5) | 10 | (25.0) | 18 | (45.0) | 4.02 | 1.12 | High |
| 4.2 Burn/heat/electric current / chemical triage code 24 | 2 | (5.0) | 2 | (5.0) | 8 | (20.0) | 9 | (22.5) | 19 | (47.5) | 4.02 | 1.17 | High |
| 4.3 Drown/ diving injury/ water-related injury triage code 25 | 2 | (5.0) | 1 | (2.5) | 9 | (22.5) | 9 | (22.5) | 19 | (47.5) | 4.05 | 1.13 | High |
| 4.4 Electrical injury triage code 26 | 3 | (7.5) | 2 | (5.0) | 6 | (15.0) | 11 | (27.5) | 18 | (45.0) | 3.98 | 1.23 | High |
| 4.5 Fall / accident/ pain triage code 27 | 2 | (5.0) | 1 | (2.5) | 8 | (20.0) | 9 | (22.5) | 20 | (50.0) | 4.10 | 1.13 | High |
| 4.6 Heat-cold triage code 28 | 3 | (7.5) | 3 | (7.5) | 7 | (17.5) | 7 | (17.5) | 20 | (50.0) | 3.95 | 1.30 | High |
| 4.7 Stabbing, gunshot, or penetrating trauma triage code 29 | 3 | (7.5) | 3 | (7.5) | 8 | (20.0) | 7 | (17.5) | 19 | (47.5) | 3.90 | 1.30 | High |
| 4.8 Traffic Incidents/Vehicle in Water triage code 30 | 3 | (7.5) | 1 | (2.5) | 9 | (22.5) | 5 | (12.5) | 22 | (55.0) | 4.05 | 1.26 | High |
| Overall injuries |  |  |  |  |  |  |  |  |  |  | 4.01 | 1.11 | High |
| **5. Telephone instructions for emergency patients** |  |  |  |  |  |  |  |  |  |  |  |  |  |
| 5.1 Airway/cardiac arrest/airway obstruction(in case of unconsciousness) triage – in newborns aged < 30 days | 1 | (2.5) | 2 | (5.0) | 2 | (5.0) | 15 | (37.5) | 20 | (50.0) | 4.28 | 0.96 | Highest |
| 5.2 Airway/cardiac arrest/airway obstruction(in case of unconsciousness) triage – in infants aged < 1 year | 0 | (0.0) | 2 | (5.0) | 3 | (7.5) | 13 | (32.5) | 22 | (55.0) | 4.37 | 0.84 | Highest |
| 5.3 Airway/cardiac arrest/airway obstruction(in case of unconsciousness) triage – in children aged 1-7 years | 0 | (0.0) | 2 | (5.0) | 4 | (10.0) | 12 | (30.0) | 22 | (55.0) | 4.35 | 0.86 | Highest |
| 5.4 Airway/cardiac arrest/airway obstruction(in case of unconsciousness) triage – in adults aged ≥ 8 years | 0 | (0.0) | 2 | (5.0) | 5 | (12.5) | 10 | (25.0) | 23 | (57.5) | 4.35 | 0.89 | Highest |
| 5.5 Delivery triage | 0 | (0.0) | 1 | (2.5) | 2 | (5.0) | 14 | (35.0) | 23 | (57.5) | 4.47 | 0.72 | Highest |
| 5.6 Choking / adults (pregnant women /obese people) | 1 | (2.5) | 2 | (5.0) | 6 | (15.0) | 6 | (15.0) | 25 | (62.5) | 4.30 | 1.07 | Highest |
| Overall telephone instructions for emergency patients | |  |  |  |  |  |  |  |  |  | 4.35 | 0.73 | Highest |
| **2. Application for triage and dispatch with emergency patients** | |  |  |  |  |  |  |  |  |  |  |  |  |
| 1. CBD increase from 26 to 30 chief complaints | 1 | (2.5) | 2 | (5.0) | 3 | (7.5) | 16 | (40.0) | 18 | (45.0) | 4.20 | 0.97 | High |
| 2. The emergency patient triage manual is straightforward, simple, and easily understood for listeners. | 1 | (2.5) | 1 | (2.5) | 6 | (15.0) | 13 | (32.5) | 19 | (47.5) | 4.20 | 0.97 | High |
| 3. Code, such as red, pink, yellow, green, and white codes. | 0 | (0.0) | 1 | (2.5) | 4 | (10.0) | 14 | (35.0) | 21 | (52.5) | 4.38 | 0.77 | Highest |
| 4. The triage manual will be able to classify reported symptoms precisely. | 0 | (0.0) | 1 | (2.5) | 8 | (20.0) | 13 | (32.5) | 18 | (45.0) | 4.20 | 0.85 | High |
| 5. Alphabet size is proper and clearly visible. | 0 | (0.0) | 2 | (5.0) | 6 | (15.0) | 13 | (32.5) | 19 | (47.5) | 4.23 | 0.89 | Highest |
| 6. The number of signs and symptoms (30 CBD) is enough. | 0 | (0.0) | 3 | (7.5) | 5 | (12.5) | 12 | (30.0) | 20 | (50.0) | 4.23 | 0.95 | Highest |
| 7. The newly revised triage and dispatch tools with emergency patients can be applied precisely and remembered well. | 0 | (0.0) | 1 | (2.5) | 7 | (17.5) | 18 | (45.0) | 14 | (35.0) | 4.13 | 0.79 | High |
| 8. Red-level patients can be triaged within 1 minute. | 0 | (0.0) | 1 | (2.5) | 7 | (17.5) | 12 | (30.0) | 20 | (50.0) | 4.28 | 0.85 | Highest |
| 9. The manual causes over triage by phone. | 0 | (0.0) | 1 | (2.5) | 5 | (12.5) | 20 | (50.0) | 14 | (35.0) | 4.18 | 0.75 | High |
| 10. The manual causes under triage by phone. | 0 | (0.0) | 4 | (10.0) | 16 | (40.0) | 9 | (22.5) | 11 | (27.5) | 3.68 | 1.00 | High |
| 11. The manual application for triage and dispatch for emergency patients. | 0 | (0.0) | 1 | (2.5) | 2 | (5.0) | 19 | (47.5) | 18 | (45.0) | 4.35 | 0.70 | Highest |
| 12. The triage and dispatch manual is modern. | 0 | (0.0) | 1 | (2.5) | 5 | (12.5) | 17 | (42.5) | 17 | (42.5) | 4.25 | 0.78 | Highest |
| 13. The triage manual makes you feel more confident in emergency patient triage. | 0 | (0.0) | 1 | (2.5) | 5 | (12.5) | 17 | (42.5) | 17 | (42.5) | 4.25 | 0.78 | Highest |
| 14. The triage and dispatch manual for emergency patients is consistent with universal triage and international. | 0 | (0.0) | 1 | (2.5) | 5 | (12.5) | 17 | (42.5) | 17 | (42.5) | 4.25 | 0.78 | Highest |
| 15. In case of application for practice, it should be a computer program system that can calculate CBD code. | 0 | (0.0) | 0 | (0.0) | 3 | (7.5) | 11 | (27.5) | 26 | (65.0) | 4.58 | 0.64 | Highest |
| 16. CBD code application training should be done systematically. | 0 | (0.0) | 0 | (0.0) | 3 | (7.5) | 8 | (20.0) | 29 | (72.5) | 4.65 | 0.62 | Highest |
| 17. CBD Code application standard examination system should exist. | 0 | (0.0) | 0 | (0.0) | 1 | (2.5) | 10 | (25.0) | 29 | (72.5) | 4.70 | 0.52 | Highest |
| Overall application for triage and dispatch with emergency patients | |  |  |  |  |  |  |  |  |  | 4.28 | 0.61 | Highest |
| **Opinions about codes** |  |  |  |  |  |  |  |  |  |  |  |  |  |
| Red 1 Unconsciousness and breathlessness (only code indicating cardiac arrest from every cause) | 0 | (0.0) | 3 | (7.5) | 4 | (10.0) | 10 | (25.0) | 23 | (57.5) | 4.33 | 0.94 | Highest |
| Red 2 Agonal breathing | 0 | (0.0) | 1 | (2.5) | 1 | (2.5) | 11 | (27.5) | 27 | (67.5) | 4.60 | 0.67 | Highest |
| Red 3 Shock : transient unconsciousness /almost transient unconsciousness when sitting/standing or pale hands and feet | 0 | (0.0) | 1 | (2.5) | 2 | (5.0) | 12 | (30.0) | 25 | (62.5) | 4.52 | 0.72 | Highest |
| Red 4 Unconscious and breathing | 0 | (0.0) | 0 | (0.0) | 2 | (5.0) | 16 | (40.0) | 22 | (55.0) | 4.50 | 0.60 | Highest |
| Pink 1 Decreased consciousness | 0 | (0.0) | 1 | (2.5) | 3 | (7.5) | 15 | (37.5) | 21 | (52.5) | 4.40 | 0.74 | Highest |
| Pink 2 Difficult breathing or unable to finish a sentence, requiring break to breathe, then differentiating specific codes in each disease | 0 | (0.0) | 2 | (5.0) | 3 | (7.5) | 15 | (37.5) | 20 | (50.0) | 4.33 | 0.83 | Highest |
| Overall opinions about codes |  |  |  |  |  |  |  |  |  |  | 4.45 | 0.62 | Highest |
